# Supplementary material for: Do pre- and post-copulatory sexually selected traits covary in large herbivores?
Source: PubMed Central journal article supplement (PMC4026391; doi:10.1186/1471-2148-14-79), 2014-04-10
Supplement: 1471-2148-14-79-S4.pdf [file 1471-2148-14-79-S4.pdf]

**Additional file 4: Table S4.** Dataset used in the analyses.

| Family                        | Species                         | Male weapon length (cm) | Male body mass (kg) | Total sperm length (µm)* | Head length (µm)     | Midpiece length (µm)  | Tail length (µm)      | Midpiece volume (µm <sup>3</sup> ) | Testes mass (g)      | Mating tactic***   |                |
|-------------------------------|---------------------------------|-------------------------|---------------------|--------------------------|----------------------|-----------------------|-----------------------|------------------------------------|----------------------|--------------------|----------------|
| Bovidae                       | <i>Addax nasomaculatus</i>      | 84.5 <sup>c</sup>       | 117.7 <sup>c</sup>  | 59.08                    | 6.58 <sup>b</sup>    | 14.41 <sup>b</sup>    | 38.09 <sup>b</sup>    | 5.23 <sup>b</sup>                  | 43.2 <sup>a</sup>    | F <sup>c</sup>     |                |
|                               | <i>Aepyceros melampus</i>       | 68.4 <sup>c</sup>       | 56.9 <sup>c</sup>   | 46.15                    | 6.52 <sup>p</sup>    | 7.63 <sup>p</sup>     | 32.00 <sup>p</sup>    | -                                  | 28.9 <sup>a</sup>    | T <sup>c</sup>     |                |
|                               | <i>Alcelaphus buselaphus</i>    | 57.5 <sup>j</sup>       | 152.1 <sup>l</sup>  | 58.15                    | 5.77 <sup>b</sup>    | 10.04 <sup>b</sup>    | 42.34 <sup>b</sup>    | 4.16 <sup>b</sup>                  | 107.0 <sup>a</sup>   | T <sup>j</sup>     |                |
|                               | <i>Ammotragus lervia</i>        | 73.6 <sup>c</sup>       | 111.8 <sup>c</sup>  | -                        | -                    | -                     | -                     | -                                  | 18.9 <sup>a</sup>    | F <sup>c</sup>     |                |
|                               | <i>Antidorcas marsupialis</i>   | 26.5 <sup>c</sup>       | 40.7 <sup>c</sup>   | 57.84                    | 6.47 <sup>b</sup>    | 9.99 <sup>b</sup>     | 41.38 <sup>b</sup>    | 3.09 <sup>b</sup>                  | 71.0 <sup>a</sup>    | T <sup>c</sup>     |                |
|                               | <i>Antilope cervicapra</i>      | 57.0 <sup>c</sup>       | 40.2 <sup>c</sup>   | 62.59                    | 9.01 <sup>b</sup>    | 13.14 <sup>b</sup>    | 40.44 <sup>b</sup>    | 4.66 <sup>b</sup>                  | 26.0 <sup>c</sup>    | T <sup>c</sup>     |                |
|                               | <i>Bubalus bubalis</i>          | 105.0 <sup>c</sup>      | 1200.0 <sup>c</sup> | 60.98                    | 6.71 <sup>b</sup>    | 11.20 <sup>b</sup>    | 43.07 <sup>b</sup>    | 1.93 <sup>b</sup>                  | 652.0 <sup>p</sup>   | F <sup>c</sup>     |                |
|                               | <i>Budorcas taxicolor</i>       | 41.2 <sup>c</sup>       | 282.7 <sup>c</sup>  | 71.71                    | 7.23 <sup>b</sup>    | 15.37 <sup>b</sup>    | 49.11 <sup>b</sup>    | 3.69 <sup>b</sup>                  | 93.4 <sup>a</sup>    | F <sup>c</sup>     |                |
|                               | <i>Capra falconeri</i>          | 108.0 <sup>c</sup>      | 92.7 <sup>c</sup>   | 62.70                    | 7.95 <sup>b</sup>    | 14.19 <sup>b</sup>    | 40.56 <sup>b</sup>    | 3.23 <sup>b</sup>                  | 20.9 <sup>a</sup>    | F <sup>c</sup>     |                |
|                               | <i>Capra hircus</i>             | 105.0 <sup>c</sup>      | 53.0 <sup>c</sup>   | 57.17                    | 7.54 <sup>b</sup>    | 13.21 <sup>b</sup>    | 36.42 <sup>b</sup>    | 2.76 <sup>b</sup>                  | 120.0 <sup>c</sup>   | F <sup>c</sup>     |                |
|                               | <i>Capra ibex</i>               | 90.0 <sup>c</sup>       | 80.5 <sup>c</sup>   | 58.47                    | 7.08 <sup>b</sup>    | 14.38 <sup>b</sup>    | 37.01 <sup>b</sup>    | 2.31 <sup>b</sup>                  | 38.3 <sup>a</sup>    | F <sup>c</sup>     |                |
|                               | <i>Capra nubiana</i>            | 100.0 <sup>c</sup>      | 70.0 <sup>c</sup>   | 64.44                    | 7.84 <sup>b</sup>    | 14.68 <sup>b</sup>    | 41.92 <sup>b</sup>    | 3.90 <sup>b</sup>                  | -                    | F <sup>c</sup>     |                |
|                               | <i>Capra sibirica</i>           | 115.1 <sup>c</sup>      | 90.0 <sup>c</sup>   | 54.78                    | 7.54 <sup>b</sup>    | 13.15 <sup>b</sup>    | 34.09 <sup>b</sup>    | 2.54 <sup>b</sup>                  | -                    | F <sup>c</sup>     |                |
|                               | <i>Cephalophus monticola</i>    | 4.5 <sup>c</sup>        | 4.4 <sup>c</sup>    | 77.50                    | 10.43 <sup>b</sup>   | 20.46 <sup>b</sup>    | 46.61 <sup>b</sup>    | 3.34 <sup>b</sup>                  | -                    | T <sup>c</sup>     |                |
|                               | <i>Cephalophus silvicultor</i>  | 14.0 <sup>b</sup>       | 52.5 <sup>l</sup>   | 60.41                    | 9.72 <sup>b</sup>    | 16.33 <sup>b</sup>    | 34.36 <sup>b</sup>    | 1.54 <sup>b</sup>                  | 33.3 <sup>a</sup>    | T <sup>b</sup>     |                |
|                               | <i>Connochaetes gnou</i>        | 64.0 <sup>c</sup>       | 166.7 <sup>c</sup>  | 62.28                    | 8.04 <sup>i</sup>    | 11.74 <sup>i</sup>    | 42.50 <sup>i</sup>    | -                                  | 137.0 <sup>b</sup>   | T <sup>c</sup>     |                |
|                               | <i>Connochaetes taurinus</i>    | 68.0 <sup>c</sup>       | 235.3 <sup>c</sup>  | 46.77                    | 5.01 <sup>q</sup>    | 7.86 <sup>q</sup>     | 33.90 <sup>q</sup>    | -                                  | 306.0 <sup>b</sup>   | T <sup>c</sup>     |                |
|                               | <i>Gazella cuvieri</i>          | 31.0 <sup>c</sup>       | 29.4 <sup>c</sup>   | 70.40                    | 9.19 <sup>b</sup>    | 10.97 <sup>b</sup>    | 50.24 <sup>b</sup>    | 1.87 <sup>b</sup>                  | 39.4 <sup>a</sup>    | T <sup>c</sup>     |                |
|                               | <i>Gazella dorcas</i>           | 31.5 <sup>c</sup>       | 16.3 <sup>c</sup>   | 62.01                    | 6.09 <sup>b</sup>    | 11.91 <sup>b</sup>    | 44.01 <sup>b</sup>    | 1.76 <sup>b</sup>                  | 31.5 <sup>a</sup>    | T <sup>c</sup>     |                |
|                               | <i>Gazella granti</i>           | 65.0 <sup>c</sup>       | 72.1 <sup>c</sup>   | 55.76                    | 8.34 <sup>b</sup>    | 10.43 <sup>b</sup>    | 36.99 <sup>b</sup>    | 0.61 <sup>b</sup>                  | -                    | T <sup>c</sup>     |                |
|                               | <i>Gazella leptoceros</i>       | 36.0 <sup>c</sup>       | 27.2 <sup>c</sup>   | 65.31                    | 8.80 <sup>b</sup>    | 12.61 <sup>b</sup>    | 43.90 <sup>b</sup>    | 3.85 <sup>b</sup>                  | 6.7 <sup>a</sup>     | T <sup>c</sup>     |                |
|                               | <i>Gazella rufifrons</i>        | 40.4 <sup>c</sup>       | 27.0 <sup>c</sup>   | 64.72                    | 9.02 <sup>b</sup>    | 12.11 <sup>b</sup>    | 43.59 <sup>b</sup>    | 2.93 <sup>b</sup>                  | 7.9 <sup>a</sup>     | T <sup>c</sup>     |                |
|                               | <i>Gazella subgutturosa</i>     | 30.0 <sup>c</sup>       | 27.4 <sup>c</sup>   | 66.93                    | 9.74 <sup>b</sup>    | 18.80 <sup>b</sup>    | 45.39 <sup>b</sup>    | 4.78 <sup>b</sup>                  | 8.2 <sup>a</sup>     | T <sup>c</sup>     |                |
|                               | <i>Gazella thomsonii</i>        | 34.0 <sup>c</sup>       | 22.7 <sup>c</sup>   | 68.68                    | 9.98 <sup>b</sup>    | 11.42 <sup>b</sup>    | 47.28 <sup>b</sup>    | 6.07 <sup>b</sup>                  | -                    | T <sup>c</sup>     |                |
|                               | <i>Hemitragus jemlahicus</i>    | 29.5 <sup>c</sup>       | 103.3 <sup>c</sup>  | -                        | -                    | -                     | -                     | -                                  | 26.7 <sup>a</sup>    | F <sup>c</sup>     |                |
|                               | <i>Kobus ellipsiprymnus</i>     | 75.0 <sup>c</sup>       | 236.8 <sup>c</sup>  | 61.61                    | 6.98 <sup>b</sup>    | 14.31 <sup>b</sup>    | 40.32 <sup>b</sup>    | 2.95 <sup>b</sup>                  | 73.7 <sup>a</sup>    | T <sup>c</sup>     |                |
|                               | <i>Kobus kob</i>                | 54.5 <sup>c</sup>       | 97.5 <sup>c</sup>   | -                        | -                    | -                     | -                     | -                                  | 41.7 <sup>a</sup>    | T <sup>c</sup>     |                |
|                               | <i>Kobus leche</i>              | 70.0 <sup>c</sup>       | 104.3 <sup>c</sup>  | 60.04                    | 8.11 <sup>b</sup>    | 10.99 <sup>b</sup>    | 40.94 <sup>b</sup>    | 3.19 <sup>b</sup>                  | 67.9 <sup>a</sup>    | T <sup>c</sup>     |                |
|                               | <i>Kobus megaceros</i>          | 68.7 <sup>c</sup>       | 105.5 <sup>c</sup>  | 57.98                    | 7.99 <sup>b</sup>    | 11.52 <sup>b</sup>    | 38.47 <sup>b</sup>    | 4.11 <sup>b</sup>                  | 52.0 <sup>a</sup>    | T <sup>c</sup>     |                |
|                               | <i>Madoqua guentheri</i>        | 7.5 <sup>c</sup>        | 3.7 <sup>c</sup>    | 51.66                    | 7.14 <sup>b</sup>    | 12.81 <sup>b</sup>    | 31.71 <sup>b</sup>    | 1.81 <sup>b</sup>                  | 3.2 <sup>a</sup>     | T <sup>c</sup>     |                |
|                               | <i>Naemorhedus goral</i>        | 14.5 <sup>c</sup>       | 32.0 <sup>c</sup>   | -                        | -                    | -                     | -                     | -                                  | 36.5 <sup>a</sup>    | T <sup>c</sup>     |                |
|                               | <i>Neotragus moschatus</i>      | 9.0 <sup>c</sup>        | 4.8 <sup>c</sup>    | 70.54                    | 9.68 <sup>b</sup>    | 15.63 <sup>b</sup>    | 45.23 <sup>b</sup>    | 2.58 <sup>b</sup>                  | 58.9 <sup>a</sup>    | T <sup>c</sup>     |                |
|                               | <i>Oryx gazella</i>             | 88.3 <sup>c</sup>       | 178.0 <sup>c</sup>  | 60.30                    | 6.10 <sup>b</sup>    | 12.98 <sup>b</sup>    | 41.22 <sup>b</sup>    | 2.08 <sup>b</sup>                  | 37.9 <sup>a</sup>    | F <sup>c</sup>     |                |
|                               | <i>Ovis canadensis</i>          | 90.0 <sup>c</sup>       | 83.4 <sup>l</sup>   | 64.68                    | 7.34 <sup>b</sup>    | 17.50 <sup>b</sup>    | 39.84 <sup>b</sup>    | 4.03 <sup>b</sup>                  | 338.0 <sup>a</sup>   | F <sup>f</sup>     |                |
|                               | <i>Pelea capreolus</i>          | 22.5 <sup>c</sup>       | 24.0 <sup>c</sup>   | 60.20                    | 4.96 <sup>b</sup>    | 11.27 <sup>b</sup>    | 43.97 <sup>b</sup>    | 1.43 <sup>b</sup>                  | -                    | T <sup>c</sup>     |                |
|                               | <i>Sylvicapra grimmia</i>       | 9.9 <sup>c</sup>        | 18.3 <sup>c</sup>   | 66.94                    | 9.74 <sup>b</sup>    | 17.08 <sup>b</sup>    | 40.12 <sup>b</sup>    | 1.55 <sup>b</sup>                  | 21.3 <sup>a</sup>    | T <sup>c</sup>     |                |
|                               | <i>Tragelaphus angasii</i>      | 65.0 <sup>c</sup>       | 110.2 <sup>c</sup>  | 63.13                    | 8.55 <sup>b</sup>    | 13.52 <sup>b</sup>    | 41.06 <sup>b</sup>    | 2.49 <sup>b</sup>                  | 38.3 <sup>a</sup>    | F <sup>c</sup>     |                |
|                               | <i>Tragelaphus eurycerus</i>    | 80.0 <sup>a</sup>       | 300.0 <sup>q</sup>  | 60.69                    | 7.81 <sup>b</sup>    | 13.15 <sup>b</sup>    | 39.73 <sup>b</sup>    | 2.22 <sup>b</sup>                  | 52.9 <sup>a</sup>    | F <sup>m</sup>     |                |
|                               | <i>Tragelaphus spekii</i>       | 66.0 <sup>c</sup>       | 102.3 <sup>c</sup>  | 58.26                    | 7.74 <sup>b</sup>    | 13.52 <sup>b</sup>    | 37.00 <sup>b</sup>    | 5.42 <sup>b</sup>                  | -                    | F <sup>c</sup>     |                |
|                               | <i>Tragelaphus strepsiceros</i> | 120.0 <sup>c</sup>      | 248.0 <sup>c</sup>  | 69.46                    | 7.62 <sup>b</sup>    | 13.98 <sup>b</sup>    | 47.86 <sup>b</sup>    | 4.60 <sup>b</sup>                  | 92.0 <sup>a</sup>    | F <sup>c</sup>     |                |
|                               | Cervidae                        | <i>Alces alces</i>      | 144.0 <sup>m</sup>  | 482.5 <sup>m</sup>       | 62.50 <sup>d</sup>   | 8.80 <sup>d</sup>     | -                     | 54.70 <sup>d</sup>                 | -                    | 106.0 <sup>p</sup> | F <sup>m</sup> |
|                               |                                 | <i>Axis axis</i>        | 84.5 <sup>m</sup>   | 89.5 <sup>m</sup>        | 66.30                | 8.90 <sup>k</sup>     | 13.80 <sup>k</sup>    | 43.60 <sup>k</sup>                 | -                    | 29.8 <sup>c</sup>  | F <sup>m</sup> |
| <i>Axis porcinus</i>          |                                 | 39.9 <sup>m</sup>       | 41.0 <sup>m</sup>   | 67.43                    | 8.70 <sup>b</sup>    | 16.91 <sup>b</sup>    | 41.82 <sup>b</sup>    | 2.98 <sup>b</sup>                  | 49.5 <sup>a</sup>    | F <sup>m</sup>     |                |
| <i>Cervus albostris</i>       |                                 | 115.0 <sup>m</sup>      | 204.0 <sup>m</sup>  | 61.06                    | 8.18 <sup>b</sup>    | 12.93 <sup>b</sup>    | 39.95 <sup>b</sup>    | 3.32 <sup>b</sup>                  | 116.4 <sup>a</sup>   | F <sup>m</sup>     |                |
| <i>Cervus duvaucelii</i>      |                                 | 81.3 <sup>m</sup>       | 236.0 <sup>m</sup>  | 63.91                    | 9.35 <sup>b</sup>    | 13.19 <sup>b</sup>    | 41.37 <sup>b</sup>    | 2.39 <sup>b</sup>                  | -                    | F <sup>m</sup>     |                |
| <i>Cervus elaphus</i>         |                                 | 93.6 <sup>m</sup>       | 250.0 <sup>m</sup>  | 61.17                    | 8.35 <sup>b***</sup> | 13.21 <sup>b***</sup> | 39.61 <sup>b***</sup> | 3.01 <sup>b***</sup>               | 97.1 <sup>a***</sup> | F <sup>m</sup>     |                |
| <i>Cervus eldii</i>           |                                 | 97.2 <sup>m</sup>       | 105.0 <sup>m</sup>  | 62.64                    | 8.20 <sup>b</sup>    | 13.24 <sup>b</sup>    | 41.20 <sup>b</sup>    | 1.30 <sup>b</sup>                  | -                    | F <sup>m</sup>     |                |
| <i>Cervus nippon</i>          |                                 | 48.0 <sup>m</sup>       | 52.0 <sup>m</sup>   | 59.82                    | 8.80 <sup>b</sup>    | 11.20 <sup>b</sup>    | 39.82 <sup>b</sup>    | 2.57 <sup>b</sup>                  | -                    | T <sup>m</sup>     |                |
| <i>Cervus timorensis</i>      |                                 | 67.5 <sup>m</sup>       | 95.5 <sup>m</sup>   | 63.76                    | 8.48 <sup>b</sup>    | 11.03 <sup>b</sup>    | 44.25 <sup>b</sup>    | 2.05 <sup>b</sup>                  | 27.4 <sup>a</sup>    | F <sup>m</sup>     |                |
| <i>Cervus unicolor</i>        |                                 | 104.9 <sup>m</sup>      | 192.0 <sup>m</sup>  | 61.67                    | 7.78 <sup>b</sup>    | 12.17 <sup>b</sup>    | 41.72 <sup>b</sup>    | 1.77 <sup>b</sup>                  | 77.5 <sup>a</sup>    | T <sup>m</sup>     |                |
| <i>Dama dama</i>              |                                 | 61.5 <sup>m</sup>       | 67.0 <sup>m</sup>   | 64.49                    | 7.96 <sup>b</sup>    | 13.64 <sup>b</sup>    | 42.89 <sup>b</sup>    | 5.96 <sup>b</sup>                  | 40.0 <sup>a</sup>    | T <sup>m</sup>     |                |
| <i>Elaphurus davidianus</i>   |                                 | 73.7 <sup>m</sup>       | 214.0 <sup>m</sup>  | 58.84                    | 8.58 <sup>b</sup>    | 10.71 <sup>b</sup>    | 39.55 <sup>b</sup>    | 4.87 <sup>b</sup>                  | 57.4 <sup>a</sup>    | F <sup>m</sup>     |                |
| <i>Mazama americana</i>       |                                 | 11.5 <sup>m</sup>       | 24.5 <sup>m</sup>   | 56.09                    | 7.38 <sup>b</sup>    | 10.37 <sup>b</sup>    | 38.34 <sup>b</sup>    | 1.42 <sup>b</sup>                  | -                    | F <sup>m</sup>     |                |
| <i>Muntiacus muntjak</i>      |                                 | 14.2 <sup>m</sup>       | 19.0 <sup>m</sup>   | 58.16                    | 6.37 <sup>b</sup>    | 15.83 <sup>b</sup>    | 35.96 <sup>b</sup>    | 2.59 <sup>b</sup>                  | 6.5 <sup>a</sup>     | T <sup>m</sup>     |                |
| <i>Muntiacus reevesi</i>      |                                 | 11.4 <sup>m</sup>       | 13.5 <sup>m</sup>   | 59.75                    | 6.79 <sup>b</sup>    | 12.93 <sup>b</sup>    | 40.03 <sup>b</sup>    | 1.20 <sup>b</sup>                  | -                    | T <sup>m</sup>     |                |
| <i>Odocoileus virginianus</i> |                                 | 65.6 <sup>m</sup>       | 154.5 <sup>m</sup>  | 52.00                    | 10.00 <sup>p</sup>   | 7.00 <sup>p</sup>     | 35.00 <sup>p</sup>    | -                                  | 85.5 <sup>p</sup>    | F <sup>m</sup>     |                |
| <i>Pudu puda</i>              |                                 | 8.5 <sup>m</sup>        | 13.0 <sup>m</sup>   | 57.98                    | 8.83 <sup>b</sup>    | 12.03 <sup>b</sup>    | 37.12 <sup>b</sup>    | 3.38 <sup>b</sup>                  | -                    | T <sup>m</sup>     |                |
| <i>Rangifer tarandus</i>      |                                 | 91.0 <sup>m</sup>       | 106.5 <sup>m</sup>  | 56.50                    | 7.64 <sup>p</sup>    | 10.38 <sup>p</sup>    | 38.48 <sup>p</sup>    | -                                  | 47.7 <sup>a</sup>    | F <sup>m</sup>     |                |

\*until otherwise stated the total sperm length is the sum of the length of the three sperm components, namely : head, midpiece and tail.

\*\* average of the measurements made on the three following *Cervus elaphus* subspecies: *Cervus elaphus bactrianus*, *Cervus elaphus barbarus*, *Cervus elaphus macneillii*.

\*\*\*F: female defence mating tactic, T: Territory defence mating tactic

## References

- <sup>a</sup> Anderson MJ, Nyholt J, Dixson AE: **Sperm competition affects the structure of the mammalian vas deferens.** *J Zool* 2004, **264**:97-103.
- <sup>b</sup> Anderson MJ, Nyholt J, Dixson AF: **Sperm competition and the evolution of sperm midpiece volume in mammals.** *J Zool* 2005, **267**:135-142.
- <sup>c</sup> Bro-Jørgensen J: **The intensity of sexual selection predicts weapon size in male bovids.** *Evolution* 2007, **61**:1316-1326.
- <sup>d</sup> Cummins JM, Woodall PF: **On mammalian sperm dimensions.** *J Reprod Fertil* 1985,**75**: 153-175.
- <sup>e</sup> Freeman S: **The evolution of the scrotum: a new hypothesis.** *J Theor Biol* 1990, **145**:429-445.
- <sup>f</sup> Isvaran K: **Variation in male mating behaviour within ungulate populations: patterns and processes.** *Curr Sci* 2005, **89**:1192-1199.
- <sup>g</sup> Ginsberg JR, Rubenstein DI: **Sperm competition and variation in zebra mating-behavior.** *Behav Ecol Sociobiol* 1990, **26**:427-434.
- <sup>q</sup> Loison A, Gaillard JM, Pelabon C, Yoccoz NG. **What factors shape sexual size dimorphism in ungulates?** *Evol Ecol Res* 1999, **1**:611-633.
- <sup>h</sup> Lumpkin S, Kranz KR: ***Cephalophus sylvicultor*.** *Mamm. Species* 1984, **225**:1-7.
- <sup>i</sup> Merilan CP, Read BW, Boever WJ, Knox D, Meehan T: **Comparative characteristics of spermatozoa and semen from 6 species of artiodactylids.** *J Zoo Anim Med* 1982, **13**:69-74.
- <sup>j</sup> Nowak RM: **Walker's mammals of the world.** Johns Hopkins Univ Press, 1999.
- <sup>k</sup> Patterson MC, Stover J, Westrom WK, Schaffer NS: **Comparative dimensional analysis of spermatozoa of 7 species of Cervidae.** *J Zoo Anim Med* 1985, **16**: 144-146.
- <sup>l</sup> Perez-Barberia FJ, Gordon IJ: **Differences in body mass and oral morphology between the sexes in the *Artiodactyla*: Evolutionary relationships with sexual segregation.** *Evol Ecol Res* 2000, **2**:667-684.
- <sup>m</sup> Plard F, Bonenfant C, Gaillard J-M: **Revisiting the allometry of antlers among deer species: male-male sexual competition as a driver.** *Oikos* 2011, **120**:601-606.
- <sup>n</sup> Ralls K: ***Tragelaphus eurycerus*.** *Mamm Species* 1978, **111**:1-4.
- <sup>o</sup> Shackleton DM: ***Ovis canadiensis*.** *Mamm Species* 1985, **230**:1-9.
- <sup>p</sup> Tourmente M, Gomendio M, Roldan ERS: **Sperm competition and the evolution of sperm design in mammals.** *BMC Evol Biol* 2011, **11**:12.
